# Supplementary material
Source: MDPI journal article supplement (https://www.mdpi.com/2072-4292/14/14/3438)
Supplement: s1 [file s1]

## Supplementary materials

### S1. SEBS for estimating daily *ET*

#### S1.1 Theoretical background

The SEBS is based on the theory of surface energy balance, linearly expressing the relationship between different heat fluxes as follows [7]:

$$R_n = G + H + \lambda \rho_w et \quad (S-1)$$

where  $R_n$  is net radiation flux at the surface ( $\text{J m}^{-2} \text{s}^{-1}$ );  $G$  is soil heat flux ( $\text{J m}^{-2} \text{s}^{-1}$ );  $H$  is turbulent sensible heat flux ( $\text{J m}^{-2} \text{s}^{-1}$ );  $\lambda \rho_w et$  is turbulent latent heat flux ( $\text{J m}^{-2} \text{s}^{-1}$ );  $\lambda$  is latent heat of vaporization of water ( $2.47 \times 10^6 \text{ J kg}^{-1}$ );  $\rho_w$  is density of water ( $1,000 \text{ kg m}^{-3}$ );  $et$  is actual evapotranspiration rate ( $\text{mm s}^{-1}$ ). Through taking both short and long wave radiations into consideration,  $R_n$  is estimated with surface reflectance (calculated using different fitting formula changing with remote sensing data sources), emissivity (calculated based on normalized differential vegetation index, NDVI) and radiation temperature obtained from remote sensing images by atmospheric correction method [18,19];  $G$  is split from  $R_n$  through a few state variables such as land cover characteristics (often represented by NDVI) and soil water content [7,20].

Different from other single-source energy balance models, SEBS introduces a parameterized calculation method for heat transfer conduction coefficient and estimates the sensible heat flux  $H$  through an iterative process [21], which can effectively reduce the uncertainty-caused error by the scalar roughness height for heat transfer on underlying heterogeneous surface in a large scale. Its main simulation process includes: Firstly, based on the similarity theory of atmospheric boundary layer, three nonlinear equations are established by combining unknown variables such as friction velocity  $u^*$ , sensible heat flux  $H$  and Obukhov length  $L$  [22]. Then, the equations are iteratively solved by Broyden method to obtain accurate and reliable  $H$ . In the simulation process, only those readily measured parameters, including wind speed, temperature, surface temperature and NDVI at the reference height, are needed, but other complicated surface energy balance terms are unnecessary to be considered [7]. In a word,  $et$  in Eq. (S-1) can be conveniently estimated using  $R_n$ ,  $G$  and  $H$  obtained from remote sensing images and meteorological data through aforementioned process.

It should also be noted that the images acquired by the satellite during transit are all transient results, that is, the regional  $et$  obtained based on remote sensing demonstrates an instantaneous distribution. However, evapotranspiration dynamics are usually practically required on a daily scale. Therefore, the estimated instantaneous  $et$  should be up-scaled to a daily average evapotranspiration rate  $ET$  ( $\text{mm d}^{-1}$ ). SEBS provides an approach to calculate evapotranspiration fraction and thus daily evapotranspiration by introducing the dry- and wet-limit of  $H$  to obtain the surface energy balance index (SEBI) “pixel by pixel”. Corresponding principle and calculation processes are presented as follows.

Under the dry-limit condition, soil water supply is absent for evapotranspiration, thus leading negligible  $\lambda \rho_w et_{dry}$  and maximum  $H_{dry}$  as:

$$H_{dry} = R_n - G - \lambda \rho_w et_{dry} = R_n - G \quad (S-2)$$

Contrarily, under the wet-limit, soil water supply yields maximum  $et_{wet}$  and thus minimum  $H_{wet}$ , i.e.:

$$H_{wet} = R_n - G - \lambda \rho_w et_{wet} \quad (S-3)$$

Consequently, the relationship between relative evapotranspiration  $A_r$  (ratio of actual to maximum  $\lambda \rho_w et_{wet}$ ) and SEBI is described as:

$$A_r = \frac{\lambda \rho_w et}{\lambda \rho_w et_{wet}} = 1 - \frac{\lambda \rho_w et_{wet} - \lambda \rho_w et}{\lambda \rho_w et_{wet}} = 1 - \frac{H - H_{wet}}{H_{dry} - H_{wet}} = 1 - SEBI \quad (S-4)$$

In meteorology, the ratio of actual latent heat flux to available energy is called evapotranspiration fraction  $A$ , viz.:

$$A = \frac{\lambda \rho_w et}{R_n - G} = \frac{A_r \cdot \lambda \rho_w et_{wet}}{R_n - G} = (1 - SEBI) \cdot \frac{\lambda \rho_w et_{wet}}{R_n - G} \quad (S-5)$$

On the basis of acquiring instantaneous  $et$  ( $\text{mm s}^{-1}$ ) through Eq. (S-1),  $ET$  ( $\text{mm d}^{-1}$ ) can then be easily calculated by integrating  $et$  within 24 hours. Due to the fact that the evapotranspiration fraction basically remains unchanged within 1 day, it should be reasonable to use the instantaneous  $A$  to approximate the daily evapotranspiration fraction for obtaining  $ET$  as Su et al. (2001) [21]:

$$ET = 8.64 \times 10^7 \times A \times \frac{\overline{R_n} - \overline{G}}{\lambda \rho_w} \quad (S-6)$$

where  $\overline{R_n}$  and  $\overline{G}$  are mean daily net radiation flux and soil heat flux, respectively, in which

$\overline{R_n}$  is estimated using the method recommended by Su et al. (2001) [21], and  $\overline{G}$  is assumed to be zero since the downward soil heat flux during the day is roughly equivalent to the upward soil heat flux at night.

### S1.2 Simulation procedure

Following four steps were designed in the simulation process of SEBS [7]:

Step 1: A series of surface parameters such as land surface albedo, emissivity, temperature and NDVI were inversely estimated using remote sensing data (e.g. visible, near-infrared and short-wave infrared bands of Landsat and MOD09GA; thermal infrared band of Landsat and MOD11A1, etc.).

Step 2:  $R_n$  was estimated by effective long-wave and short-wave radiation, using surface parameters (e.g. solar zenith angle and surface temperature, etc.) derived from remote sensing inversion, atmospheric transmittance obtained by quoting the Digital Elevation Model (DEM) and measured mean air temperature as the input data.  $G$  was estimated through splitting  $R_n$  according to the vegetation coverage  $f_c$  calculated from NDVI.

Step 3:  $H$  was obtained through iteratively solving nonlinear equations between  $u^*$ ,  $H$  and  $L$  based on  $f_c$  and meteorological data (e.g. wind speed, air temperature and surface temperature) according to the atmospheric boundary layer similarity theory.

Step 4: SEBI was used to define the dry- and wet-limit and calculate  $A$  and  $ET$ .

All of the above simulation processes were conducted based on ENVI 5.5 (Exelis Visual Information Solutions, America) and Python 2.7 (Python Software Foundation, America).

## S2. ESTARFM for fusing remote sensing data

### S2.1 Theoretical background

Both  $ET_{\text{Landsat}}$  and  $ET_{\text{MODIS}}$  estimated by SEBS were fused through ESTARFM [23] to obtain  $ET_{\text{ESTARFM}}$  during the growing season of CFFMDI. Before the fusion, the nearest neighbor interpolation method included in ArcGIS10.3 (Esri, America) was used to re-sample  $ET_{\text{MODIS}}$  data to 30 m pixels, which were then accurately registered and clipped with  $ET_{\text{Landsat}}$  as the input data of ESTARFM. The corresponding fusion process was realized through Interactive Data Language (IDL) programming according to the equations of Zhu et al. (2010) [23]:

$$ET(x_{w/2}, y_{w/2}, t_p) = T_m \times ET_m(x_{w/2}, y_{w/2}, t_p) + T_n \times ET_n(x_{w/2}, y_{w/2}, t_p) \quad (\text{S-7})$$

$$ET_k(x_{w/2}, y_{w/2}, t_p) = ET_L(x_{w/2}, y_{w/2}, t_k) + \sum_{i=1}^N W_i V_i (ET_M(x_i, y_i, t_p) - ET_M(x_i, y_i, t_k)), \quad (k=m, n) \quad (\text{S-8})$$

where  $N$  is the number of similar pixels including the central predicted pixel;  $w$  is the width of the search window used for distance normalization, set as the recommended value of 5 by Zhu et al. (2010) [23];  $(x_{w/2}, y_{w/2})$  is the central location of predicted pixel;  $(x_i, y_i)$  is the location of  $i$ th similar pixel ( $i = 1, 2, \dots, N$ ), which is identified using a method proposed by Gao et al. (2006) [16];  $ET(x_{w/2}, y_{w/2}, t_p)$  represents the finally obtained high spatial and temporal resolution  $ET$  value at prediction time of  $t_p$  (d) after fusion, in which  $t_p$  should be chosen between two reference times of  $t_m$  and  $t_n$ ;  $ET_m(x_{w/2}, y_{w/2}, t_p)$  represents the high-resolution  $ET$  at  $t_p$  time, which was jointly predicted by combining Landsat plus MODIS images at  $t_m$  time with MODIS images at  $t_p$  time; Similarly,  $ET_n(x_{w/2}, y_{w/2}, t_p)$  represents the high-resolution  $ET$  at  $t_p$  time, jointly predicted by combining Landsat plus MODIS images at  $t_n$  time with MODIS images at  $t_p$  time;  $ET_L$  and  $ET_M$  stand for the abbreviation of  $ET_{\text{Landsat}}$  and  $ET_{\text{MODIS}}$ , respectively;  $W_i$  is the weight of  $i$ th similar pixel;  $V_i$  is the conversion coefficient of the  $i$ th similar pixel considering mixed pixel decomposition;  $T_m$  and  $T_n$  are the temporal weight factors of  $t_m$  and  $t_n$ , respectively, calculated by:

$$T_k = \frac{1 / \left| \sum_{j=1}^w \sum_{l=1}^w ET_M(x_j, y_l, t_k) - \sum_{j=1}^w \sum_{l=1}^w ET_M(x_j, y_l, t_p) \right|}{\sum_{k=m, n} (1 / \left| \sum_{j=1}^w \sum_{l=1}^w ET_M(x_j, y_l, t_k) - \sum_{j=1}^w \sum_{l=1}^w ET_M(x_j, y_l, t_p) \right|)}, \quad (k=m, n) \quad (\text{S-9})$$

The weight factor  $W_i$  characterizes the contribution of the  $i$ th similar pixel to change

prediction of central pixel  $ET$ , which is determined by the position of similar pixel and spectral similarity of coarse and fine pixels as:

$$W_i = (1 / D_i) / \sum_{i=1}^N (1 / D_i) \quad (S-10)$$

$$D_i = (1 - R_i) \times d_i \quad (S-11)$$

$$d_i = 1 + \sqrt{(x_{w/2} - x_i)^2 + (y_{w/2} - y_i)^2} / (w / 2) \quad (S-12)$$

$$R_i = \frac{E[(ET_{Li} - E(ET_{Li}))(ET_{Mi} - E(ET_{Mi}))]}{\sqrt{D(ET_{Li})} \bullet \sqrt{D(ET_{Mi})}} \quad (S-13)$$

$$ET_{Li} = \{ET_L(x_i, y_i, t_m), ET_L(x_i, y_i, t_n)\} \quad (S-14)$$

$$ET_{Mi} = \{ET_M(x_i, y_i, t_m), ET_M(x_i, y_i, t_n)\} \quad (S-15)$$

where  $R_i$  and  $d_i$  represent the spectral similarity and geographic similarity between the  $i$ th similar and central pixels, respectively;  $E$  is the expected value;  $D$  is the variance;  $ET_{Li}$  and  $ET_{Mi}$  represent the serial pixel  $ET$  values of similar pixels  $(x_i, y_i)$  at all reference moments from Landsat and MODIS images, respectively. The conversion coefficient  $V_i$  is linearly calculated as the slope between  $ET_{Li}$  and  $ET_{Mi}$ :

$$V_i = \frac{ET_L(x_i, y_i, t_m) - ET_L(x_i, y_i, t_n)}{ET_M(x_i, y_i, t_m) - ET_M(x_i, y_i, t_n)} \quad (S-16)$$

More other details about ESTARFM were described in Zhu et al. (2010) [23].

## S2.2 Data fusion procedure

During each fusion procedure for a definite prediction time of  $t_p$  (between  $t_m$  and  $t_n$ ) in the ESTARFM algorithm, three groups (and five series) of  $ET$  distributions estimated using different remote sensing sources were required as input data: first was originated from fine-resolution Landsat images at two reference times  $t_m$  and  $t_n$ , with two  $ET$  series named as  $ET_{Landsat-m}$  and  $ET_{Landsat-n}$ , respectively; second was from coarse-resolution MODIS images at the same two reference times with two series of  $ET_{MODIS-m}$  and  $ET_{MODIS-n}$ , respectively; and the last was from MODIS images at  $t_p$ , with just one serial of  $ET_{MODIS-p}$ . The fusion process mainly included the following three steps:

Step 1, selection of similar pixels: Firstly, for the  $ET_{Landsat}$  map at each reference time ( $t_m$  or  $t_n$ ), the target pixel was determined (according to the one-by-one selection rule for covering all pixels of the map) and taken as the center for searching similar pixels, and a search box (with the width of  $w$  as shown in Eqs. S-7 and S-8) was set for the neighbor pixels to calculate the  $ET$  difference between each pixel located in the box and the target pixel. Secondly, the similar pixels were identified [16] and classified for Eq. (S-8) and calculation of  $W_i$ .

Step 2,  $W_i$  calculation of similar pixels: The weight  $W_i$  should be known and distributed for each selected similar pixel to estimate  $ET$  of the target pixel at the prediction time  $t_p$ . Its

calculation procedures were carried out as follows: (1) Calculations of geographic similarity and spectral similarity: According to Eqs. (S-12) and (S-13), the geographic similarity ( $d_i$ ) and the spectral similarity ( $R_i$ ) between the similar and central pixels at  $t_m$  or  $t_n$  were calculated respectively; (2) Weight calculation: On the basis of obtaining  $d_i$  and  $R_i$ ,  $W_i$  was further calculated using a normalization method according to Eq. (S-10).

Step 3,  $ET$  calculation of target pixel at  $t_p$ : (1) Conversion coefficient calculation ( $V_i$ ): Eq. (S-16) was used to obtain the value of  $V_i$ ; (2) With known  $W_i$  and  $V_i$ , the fine-resolution central pixel values  $ET_m(x_{w/2}, y_{w/2}, t_p)$  and  $ET_n(x_{w/2}, y_{w/2}, t_p)$  at  $t_p$  were calculated according to the two pairs of images (Landsat and MODIS respectively) at two reference times of  $t_m$  ( $ET_L(x_{w/2}, y_{w/2}, t_m)$  and  $ET_M(x_{w/2}, y_{w/2}, t_m)$ ) and  $t_n$  ( $ET_L(x_{w/2}, y_{w/2}, t_n)$  and  $ET_M(x_{w/2}, y_{w/2}, t_n)$ ) using Eq. (S-8); (3) Finally, the fused evapotranspiration value ( $ET_{ESTARFM}$ ) of target pixel at  $t_p$  time  $ET(x_{w/2}, y_{w/2}, t_p)$  was obtained by the weighted combination of the two predicted results ( $ET_m(x_{w/2}, y_{w/2}, t_p)$  and  $ET_n(x_{w/2}, y_{w/2}, t_p)$ ) through Eq. (S-7).

### S3. Information of Landsat images used in this study

**Table S1.** Specification of Landsat 5, Landsat 7 and Landsat 8 data used in this study

| Date<br>(day/month/year) | Day of<br>year | Overpass<br>time<br>(UTC) | Sensor | Platform  | Cloud<br>cover (%) | Purpose* |
|--------------------------|----------------|---------------------------|--------|-----------|--------------------|----------|
| 06/07/2000               | 188            | 04:53:42                  | ETM    | Landsat 7 | 0                  | ET       |
| 24/09/2000               | 268            | 04:52:33                  | ETM    | Landsat 7 | 0                  | ET/LC    |
| 09/07/2001               | 190            | 04:53:44                  | ETM    | Landsat 7 | 5                  | ET       |
| 10/08/2001               | 222            | 04:51:03                  | ETM    | Landsat 7 | 2                  | ET/LC    |
| 14/09/2002               | 257            | 04:49:58                  | ETM    | Landsat 7 | 2                  | ET/LC    |
| 01/11/2002               | 305            | 04:49:55                  | ETM    | Landsat 7 | 3                  | ET       |
| 31/07/2003               | 212            | 04:50:33                  | ETM    | Landsat 7 | 1                  | ET       |
| 03/10/2003               | 276            | 04:50:16                  | ETM    | Landsat 7 | 2                  | ET/LC    |
| 02/08/2004               | 215            | 04:50:55                  | ETM    | Landsat 7 | 2                  | ET       |
| 18/08/2004               | 231            | 04:50:54                  | ETM    | Landsat 7 | 3                  | ET/LC    |
| 18/06/2005               | 169            | 04:51:32                  | ETM    | Landsat 7 | 3                  | ET       |
| 21/08/2005               | 233            | 04:51:24                  | ETM    | Landsat 7 | 1                  | ET/LC    |
| 31/07/2006               | 212            | 04:55:21                  | TM     | Landsat 5 | 0                  | ET       |
| 17/09/2006               | 260            | 04:55:55                  | TM     | Landsat 5 | 4                  | ET/LC    |
| 02/07/2007               | 183            | 04:55:53                  | TM     | Landsat 5 | 4                  | ET       |
| 19/08/2007               | 231            | 04:55:25                  | TM     | Landsat 5 | 9                  | ET       |
| 04/09/2007               | 247            | 04:55:15                  | TM     | Landsat 5 | 3                  | LC       |
| 18/06/2008               | 170            | 04:49:42                  | TM     | Landsat 5 | 15                 | ET       |
| 29/08/2008               | 242            | 04:51:09                  | ETM    | Landsat 7 | 0                  | LC       |
| 10/08/2008               | 282            | 04:46:27                  | TM     | Landsat 5 | 0                  | ET       |
| 23/07/2009               | 204            | 04:51:04                  | TM     | Landsat 5 | 3                  | ET       |
| 08/08/2009               | 220            | 04:51:18                  | TM     | Landsat 5 | 0                  | ET       |

|            |     |          |          |           |       |       |
|------------|-----|----------|----------|-----------|-------|-------|
| 24/08/2009 | 236 | 04:51:33 | TM       | Landsat 5 | 8     | LC    |
| 08/06/2010 | 159 | 04:52:46 | TM       | Landsat 5 | 0     | ET    |
| 11/08/2010 | 223 | 04:52:26 | TM       | Landsat 5 | 6     | ET    |
| 19/08/2010 | 231 | 04:54:20 | ETM      | Landsat 7 | 7     | LC    |
| 03/07/2011 | 194 | 04:51:15 | TM       | Landsat 5 | 0     | ET    |
| 29/07/2011 | 210 | 04:51:06 | TM       | Landsat 5 | 0     | ET    |
| 07/09/2011 | 250 | 04:55:26 | ETM      | Landsat 7 | 0     | LC    |
| 24/08/2012 | 237 | 04:57:19 | ETM      | Landsat 7 | 1     | ET    |
| 25/09/2012 | 269 | 04:57:39 | ETM      | Landsat 7 | 3     | ET/LC |
| 19/08/2013 | 231 | 05:04:08 | OLI_TIRS | Landsat 8 | 0.53  | ET    |
| 04/09/2013 | 247 | 05:04:08 | OLI_TIRS | Landsat 8 | 0.06  | ET/LC |
| 21/07/2014 | 202 | 05:01:59 | OLI_TIRS | Landsat 8 | 2.21  | ET    |
| 06/08/2014 | 218 | 05:02:07 | OLI_TIRS | Landsat 8 | 3.32  | ET/LC |
| 21/05/2015 | 141 | 05:01:09 | OLI_TIRS | Landsat 8 | 2.21  | ET    |
| 10/09/2015 | 253 | 05:01:59 | OLI_TIRS | Landsat 8 | 3.05  | ET/LC |
| 24/06/2016 | 176 | 05:01:53 | OLI_TIRS | Landsat 8 | 11.58 | ET    |
| 11/08/2016 | 224 | 05:02:08 | OLI_TIRS | Landsat 8 | 2.71  | ET/LC |
| 13/07/2017 | 194 | 05:01:55 | OLI_TIRS | Landsat 8 | 2.36  | ET    |
| 29/07/2017 | 210 | 05:02:03 | OLI_TIRS | Landsat 8 | 1.43  | ET    |
| 15/09/2017 | 258 | 05:02:13 | OLI_TIRS | Landsat 8 | 4.68  | LC    |
| 14/06/2018 | 165 | 05:00:59 | OLI_TIRS | Landsat 8 | 3.89  | ET    |
| 17/08/2018 | 229 | 05:01:33 | OLI_TIRS | Landsat 8 | 8.42  | ET/LC |
| 03/07/2019 | 184 | 05:02:01 | OLI_TIRS | Landsat 8 | 0.11  | ET    |
| 21/09/2019 | 264 | 05:02:25 | OLI_TIRS | Landsat 8 | 0.46  | ET/LC |
| 05/07/2020 | 187 | 05:01:55 | OLI_TIRS | Landsat 8 | 15.47 | ET    |
| 22/08/2020 | 235 | 05:02:11 | OLI_TIRS | Landsat 8 | 2.02  | ET/LC |

Note\*: ET and LC in the purpose column refer to the remote sensing data used for evapotranspiration estimation and land use classification, respectively.

## S4. Results and discussion about land use identification and classification

### S4.1 Accuracy evaluation of identification and classification

Comparison results showed that the classification accuracy of each year was very similar to each other in the 21 years. For simplicity, 1386 classification samples in 2018 and 2019, comprising of 1000 crop field samples obtained from regional investigation and 386 other feature samples from visual interpretation, were representatively used to demonstrate the accuracy evaluation of identification and classification. Based on the RF model, two Landsat remote sensing images on August 17, 2018 and September 21, 2019 were selected to carry out surface feature identification and classification for the oasis in MRB. By comparing with visual interpretation results, the land use classification confusion matrix was formulated (Figure S1), wherein the diagonal elements were the producer's accuracies. The overall accuracy, Kappa coefficient and user's accuracies of various land cover classes calculated by confusion matrix

were demonstrated in Table S2. Correspondingly, the accuracy evaluation indices showed that the land use classification and identification had OA greater than 0.88, and Kappa coefficient not less than 0.86.

As for the identification of cotton fields, the cotton validation samples were rarely misclassified into other features with PA above 0.93 (Figure S1). The proportion of other features mistakenly divided into cotton was slightly higher with UA of about 0.86 (Table S2), due to the growth differences of cotton in the whole basin. Compared with other land features, grape vineyard, pepper and maize are most likely to be confused with cotton in classification (Figure S1), mainly due to their similar growth period and spectral characteristics. Nevertheless, from the results of UA and PA, the misclassification ratio between them was acceptable. Therefore, the recognition results of cotton fields can be further applied.

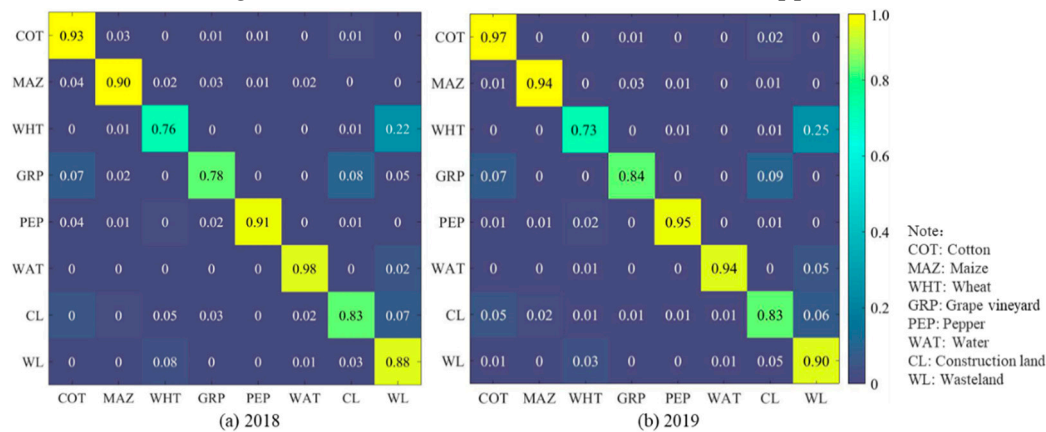

**Figure S1.** Confusion matrix of surface feature classification in (a) 2018 and (b) 2019. Note: Each column represents the real category of the instance, and each row represents the predicted category of the instance; The main diagonal value is producer's accuracy)

**Table S2.** Classification accuracy statistics in 2018 and 2019.

| Index \ Year | UA   |      |      |      |      |      |      |      | OA   | Kappa |
|--------------|------|------|------|------|------|------|------|------|------|-------|
|              | COT  | MAZ  | WHT  | GRP  | PEP  | WAT  | CL   | BL   |      |       |
| 2018         | 0.86 | 0.93 | 0.84 | 0.9  | 0.98 | 0.95 | 0.71 | 0.85 | 0.88 | 0.86  |
| 2019         | 0.87 | 0.97 | 0.92 | 0.94 | 0.92 | 0.99 | 0.71 | 0.81 | 0.89 | 0.87  |

Note: COT, cotton; MAZ, maize; WHT, wheat; GRP, grape vineyard; PEP, pepper; WAT, water; CL, construction land; WL, wasteland. UA, user's accuracy; OA, overall accuracy; Kappa, Kappa coefficient.

#### S4.2 Distribution and evolution of CFFMDI

In the oasis farmlands of MRB, the central cultivated crop is cotton, while other crops such as wheat, corn and pepper are also sporadically distributed (Figure S1 and Table S2). Considering that this study mainly focused on cotton fields (under FMDI), for the sake of simplicity, we divided the surface features in MRB into three groups of cotton fields, non-cotton agricultural fields and non-farmland.

Based on the results of remote sensing inversion for surface feature identification and classification, the spatial distribution of cotton fields, non-cotton agricultural fields and non-farmland in MRB over the period of 2000-2020 were statistically analyzed. Presented are

representative data from 2000, 2005, 2010, 2015 and 2020 (Figure S2). Over the past 21 years, the area and distribution of cotton fields has continuously changed. At the beginning of this century, the area of cotton fields in MRB was 2,431.5 km<sup>2</sup>, accounting for 82% of the farmland area and 21% of the oasis area (Figure S3). They were mainly distributed in the north of upstream, the middle of downstream, and the area other than the central part of midstream sections (Figure S2). Since then, although slight fluctuations were observed in a few of the years, the overall area of farmland and cotton fields tended to constantly increase, while the proportion of non-farmland decreased significantly. By 2020, the area of farmland and cotton fields increased to 5,324.9 km<sup>2</sup> (48% of the total oasis area) and 4,931.2 km<sup>2</sup> (44.5%), respectively. Meanwhile, the proportion of non-farmland (wasteland) decreased from 73.4% to 52.0%. With a very low proportion in the oasis of MRB, the area of non-cotton agricultural fields remained relatively stable with a proportion basically between 2.3% and 5.1% for the last 21 years.

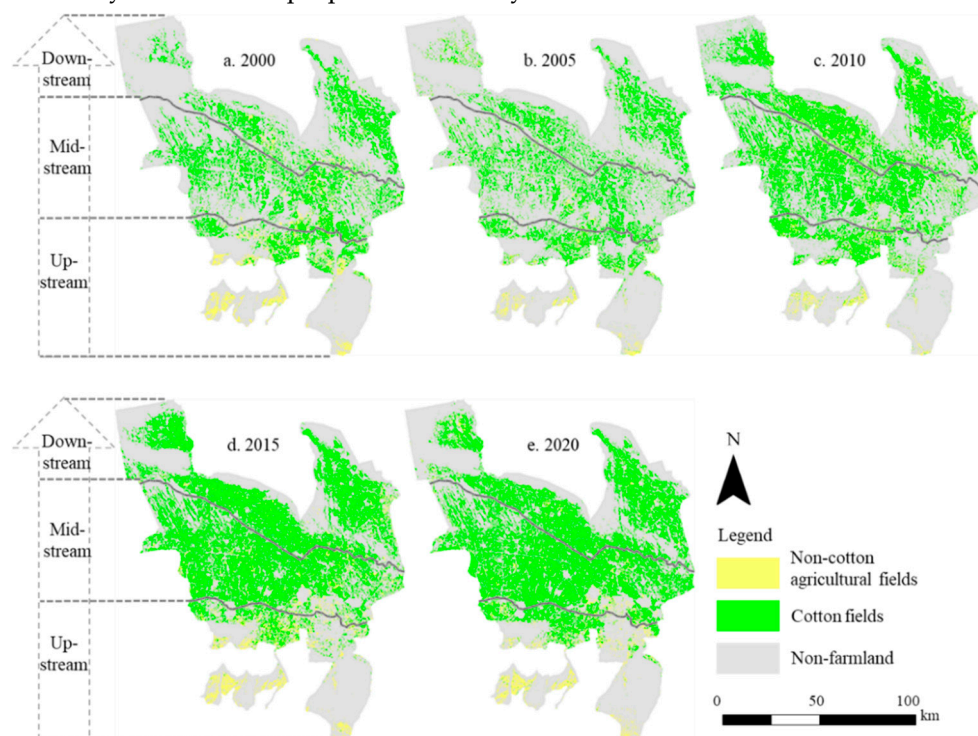

**Figure S2.** Dynamic spatial distribution of cotton fields, non-cotton agricultural fields and non-farmland in Manas River Basin (a. 2000; b. 2005; c. 2010; d. 2015; e. 2020).

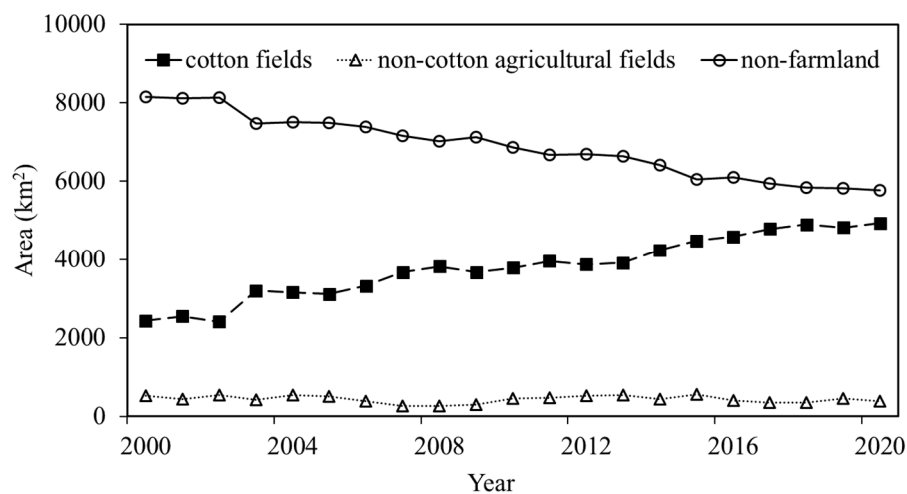



**Figure S3.** Changing process of the area for cotton fields, non-cotton agricultural fields and non-farmland in Manas River Basin from 2000 to 2020.

The increased area of cotton fields originated mainly from wasteland (Figure S3). The area increased by some 119 km<sup>2</sup> yr<sup>-1</sup>, with an annual increasing rate of 4.9%. Most of the expanded cotton fields were located in the midstream and downstream sections of the MRB (Figure S2), in close relation to local natural (hydrological, geological and geomorphic) conditions. Historically, those places were mainly saline wastelands, and only a small area that had been less saline-affected was converted to planted cropland (Figure S2a). Since the end of the last century, local agricultural production has been tremendously influenced by various agricultural scientific and technological advances such as the development of FMDI technology, breeding of salt-tolerant and drought-resistant varieties, adjustment of agricultural planting methodologies, improvement of supporting facilities for water conservancy projects, and advances in agricultural mechanization. Further, the area's dynamics were influenced by implementation of a national policy to stabilize the area under grain production and increase that under cotton. The FMDI technology, with its potential in saving water, increasing yield, and most importantly, in leaching root-zone salt to deeper soil layers by way of high frequency drip-irrigation [5], had particular importance promoting the gradual increase in potential cotton growing area in mildly, moderately or even severely salinized soils. Consequently, due to the application of FMDI, large areas of salt-affected wasteland and abandoned land were gradually reclaimed as farmland mainly for cotton fields in the MRB [32]. This has resulted in significantly increased area of CFFMDI with a concentrated and contiguous trend in the midstream and downstream areas of the basin that have gradually expanded to the desert area (Figures S2 and S3).

The area of planted cotton is affected by many complex factors in addition to those indicated in this study, such as market regulation, climate change, and even the global financial crisis. These factors are expected to lead to feedback mechanisms that cause fluctuations in cotton area in the MRB. For example, a regional drought occurring in 2002 resulted in a reduction in cotton planting area and yield. In the next year of 2003, strong market demand and rising prices stimulated rapid increase of cotton planting and a consequential surplus cotton supply. By 2004, the fallen price of cotton frustrated farmers' enthusiasm for its planting, thus leading to the reduction in area of cotton fields once again, which was not recovered until 2006. Further fluctuations of local cotton field area from 2008 to 2009 were mainly a result of the global financial crisis (Fig. S3).

Non-cotton agricultural fields in the basin are mainly distributed in the southern part of the upstream zone (Figure S2). This is likely because the upstream area is relatively unsuitable for cotton growth due to its higher altitude, lower temperature and relatively high gravel composition of root zone soils. This area is mostly inhabited by Kazakhs engaging mainly in animal husbandry production, whose preference is to cultivate food crops like corn and wheat. The non-cotton agricultural fields occupy a relatively small area in the mid and downstream areas, where they are mostly intercropped with cotton fields (Figure S2), due to advantages of intercropping in enhancing crop yield, improving cotton quality and reducing the risk of disease and insect pests [33].
